# Supplementary material for: The Epidemiological Profile and Morbidity-Mortality Patterns of Technological Disasters in the Americas from 2000 to 2021: a cross-sectional study
Source: Research Square preprint supplement (doi:10.21203/rs.3.rs-4169973/v1), 2024-04-02
Supplement: Supplementary file 1 [file d29f913147d49ec59a34c5b9.docx]

Table 1: Absolute and relative frequencies of each type of technological disaster by year of occurrence

|  | Transport Accidents | | | | | | | Industrial Accidents | | | | | | | Miscellaneous Accidents | | | | | | |
| --- | --- | --- | --- | --- | --- | --- | --- | --- | --- | --- | --- | --- | --- | --- | --- | --- | --- | --- | --- | --- | --- |
| Years | n (%) | Mortality Rate | | Affected Rate | | Injury Rate | | n (%) | Mortality Rate | | Affected Rate | | Injury Rate | | n (%) | Mortality Rate | | Affected Rate | | Injury Rate | |
|  |  | Mean | SD | Mean | SD | Mean | SD |  | Mean | SD | Mean | SD | Mean | SD |  | Mean | SD | Mean | SD | Mean | SD |
| 2000 | 39 ( 75.00) | 1286.30 | 2871.29 | 17.41 | 1 (1.92) | 1539.09 | 4605.96 | 1 (1.92) | 0.00 | 0.00 | 0.00 | 0.00 | 0.00 | 0.00 | 12 (23.08) | 288.90 | 484.94 | 0.00 | 0.00 | 333804.12 | 116159.50 |
| 2001 | 25 (73.53) | 511.85 | 917.13 | 2.21 | 4 (11.76) | 24102.12 | 119979.10 | 4 (11.76) | 83.33 | 146.51 | 0.00 | 0.00 | 0.19 | 0.38 | 5 (14.71) | 11.94 | 17.33 | 0.00 | 0.00 | 40.32 | 72.77 |
| 2002 | 35 (77.78) | 1414.35 | 3939.07 | 0.00 | 1 (2.22) | 2021.28 | 6653.91 | 1 (2.22) | 58035.71 | 0.00 | 0.00 | 0.00 | 0.00 | 0.00 | 9 ( 20.00) | 77.16 | 120.52 | 2900.65 | 8701.95 | 768.46 | 1347.02 |
| 2003 | 30 (78.95) | 610.92 | 903.40 | 352.99 | 2 (5.26) | 706.51 | 1732.50 | 2 (5.26) | 105.81 | 149.64 | 19810.32 | 28016.02 | 238.08 | 336.70 | 6 (15.79) | 779.10 | 1495.03 | 114.60 | 224.60 | 1070.10 | 2245.40 |
| 2004 | 28 (70.00) | 591.87 | 1574.34 | 161.95 | 3 (7.50) | 763.11 | 2828.19 | 3 (7.50) | 803.96 | 1389.84 | 2907.51 | 4932.71 | 0.45 | 0.44 | 9 (22.50) | 73.30 | 106.82 | 0.00 | 0.00 | 51.87 | 80.94 |
| 2005 | 29 (70.73) | 1085.63 | 3103.77 | 278.53 | 1 (2.44) | 1014.53 | 3664.41 | 1 (2.44) | 7.24 | 0.00 | 0.00 | 0.00 | 82.11 | 0.00 | 11 (26.83) | 422.07 | 1077.69 | 0.00 | 0.00 | 1245.83 | 1341.90 |
| 2006 | 24 (82.76) | 4589.42 | 17661.45 | 0.89 | 3 (10.34) | 1622.10 | 3749.55 | 3 (10.34) | 554.56 | 923.28 | 0.29 | 0.50 | 317.89 | 390.68 | 2 (6.90) | 1.33 | 0.81 | 0.00 | 0.00 | 1.96 | 2.35 |
| 2007 | 21 (67.74) | 5894.78 | 24419.12 | 11.31 | 5 (16.13) | 310.54 | 698.40 | 5 (16.13) | 914.01 | 808.83 | 19.58 | 43.78 | 291.95 | 698.52 | 5 (16.13) | 38.00 | 45.07 | 3636.36 | 8131.16 | 31.78 | 71.07 |
| 2008 | 41 (87.23) | 1086.47 | 5647.45 | 16.96 | 2 (4.26) | 1512.58 | 8793.26 | 2 (4.26) | 1.19 | 0.48 | 2672.17 | 3779.02 | 6.21 | 2.10 | 4 (8.51) | 25.15 | 41.45 | 0.04 | 0.09 | 35.48 | 69.74 |
| 2009 | 31 (86.11) | 6684.16 | 23674.99 | 127.42 | 2 (5.56) | 10061.60 | 36558.02 | 2 (5.56) | 2.62 | 3.70 | 1544.92 | 2184.84 | 0.24 | 0.34 | 3 (8.33) | 241.97 | 359.89 | 0.17 | 0.29 | 2442.64 | 4194.50 |
| 2010 | 33 (78.57) | 4125.20 | 8896.37 | 503.02 | 5 (11.9) | 3731.36 | 11224.38 | 5 (11.9) | 672.64 | 1285.03 | 0.00 | 0.00 | 152.56 | 340.46 | 4 ( 9.52) | 263.19 | 203.67 | 0.00 | 0.00 | 522.45 | 648.54 |
| 2011 | 24 (77.42) | 4368.82 | 11964.06 | 5.26 | 5 (16.13) | 1829.10 | 5410.85 | 5 (16.13) | 256.61 | 423.09 | 0.00 | 0.00 | 121.28 | 271.19 | 2 (6.45) | 1702.89 | 2403.02 | 0.00 | 0.00 | 0.00 | 0.00 |
| 2012 | 26 (78.79) | 2440.90 | 7616.10 | 0.44 | 3 (16.13) | 4275.80 | 14681.87 | 3 (16.13) | 61.70 | 13.95 | 0.00 | 0.00 | 3123.19 | 5296.74 | 4 (12.12) | 1537.16 | 3042.99 | 2067.22 | 4134.44 | 418.91 | 832.15 |
| 2013 | 22 (73.33) | 928.49 | 2432.27 | 20544.24 | 3 (10.00) | 438.12 | 1092.60 | 3 (10.00) | 40.73 | 66.21 | 1240.21 | 1781.19 | 526.87 | 896.89 | 5 (16.67) | 2676.17 | 5445.19 | 0.00 | 0.00 | 11752.78 | 26026.27 |
| 2014 | 24 (70.59) | 529.73 | 1115.10 | 41.63 | 5 (14.71) | 452.49 | 954.51 | 5 (14.71) | 451.66 | 687.46 | 113014.20 | 252707.40 | 400.59 | 654.93 | 5 (14.71) | 4366.85 | 9736.23 | 0.00 | 0.00 | 716.03 | 1585.05 |
| 2015 | 23 (76.67) | 3214.54 | 8905.67 | 0.00 | 5 (16.67) | 7613.79 | 27686.14 | 5 (16.67) | 49607.50 | 110765.50 | 24085.30 | 53856.37 | 4317.95 | 9654.86 | 2 (6.67) | 39.62 | 43.48 | 0.00 | 0.00 | 41.99 | 5.01 |
| 2016 | 18 (75.00) | 788.59 | 1686.96 | 149.38 | 4 (16.67) | 246.91 | 595.18 | 4 (16.67) | 51.98 | 66.40 | 0.00 | 0.00 | 108.39 | 216.79 | 2 (8.33) | 344.02 | 443.63 | 0.00 | 0.00 | 564.59 | 796.07 |
| 2017 | 23 (79.31) | 2206.83 | 9386.87 | 15.09 | 3 (10.34) | 3710.18 | 17268.82 | 3 (10.34) | 672.00 | 1048.78 | 0.00 | 0.00 | 4755.49 | 8093.16 | 3 (10.34) | 513.11 | 447.13 | 0.00 | 0.00 | 349.90 | 604.16 |
| 2018 | 16 (76.19) | 8977.12 | 34876.88 | 0.00 | 1 (4.76) | 4337.68 | 16249.05 | 1 (4.76) | 2124.04 | 0.00 | 0.00 | 0.00 | 1699.24 | 0.00 | 4 (19.05) | 47.63 | 90.72 | 349.46 | 698.93 | 2.38 | 4.75 |
| 2019 | 23 (74.19) | 694.90 | 1686.31 | 52.43 | 2 (6.45) | 212.92 | 521.85 | 2 (6.45) | 8516.89 | 1738.82 | 0.00 | 0.00 | 641.29 | 906.92 | 6 (19.35) | 3.01 | 3.07 | 0.00 | 0.00 | 2.60 | 2.39 |
| 2020 | 9 (69.23) | 869.23 | 1212.26 | 7.53 | 1 (7.69) | 855.00 | 1323.29 | 1 (7.69) | 1530.54 | 0.00 | 0.00 | 0.00 | 556.56 | 0.00 | 3 (23.08) | 11.12 | 16.83 | 0.00 | 0.00 | 0.11 | 0.20 |
| 2021 | 18 (81.82) | 2589.19 | 12667.55 | 0.00 | 1 (4.55) | 4532.48 | 18896.55 | 1 (4.55) | 381.43 | 0.00 | 0.00 | 0.00 | 0.00 | 0.00 | 3 (13.64) | 5330.44 | 9231.06 | 0.00 | 0.00 | 5.66 | 6.59 |
| TOTAL | 562 (76.67) | 2589.19 | 12667.55 | 894.77 | 62 (8.46) | 3473.06 | 28331.55 | 62 (8.46) | 5577.20 | 32138.84 | 12033.78 | 73163.01 | 921.57 | 3415.09 | 109 (13.64) | 730.09 | 2902.93 | 501.31 | 3126.00 | 4673.45 | 38886.80 |
